# Supplementary material for: Thymol Ameliorates Aspergillus fumigatus Keratitis by Downregulating the TLR4/ MyD88/ NF-kB/ IL-1β Signal Expression and Reducing Necroptosis and Pyroptosis
Source: PubMed Central journal article supplement (PMC9895997; doi:10.4014/jmb.2207.07017), 2022-12-01
Supplement: jmb-33-1-43-supple.pdf [file jmb-33-1-43-supple.pdf]

Supplementary fig. S1

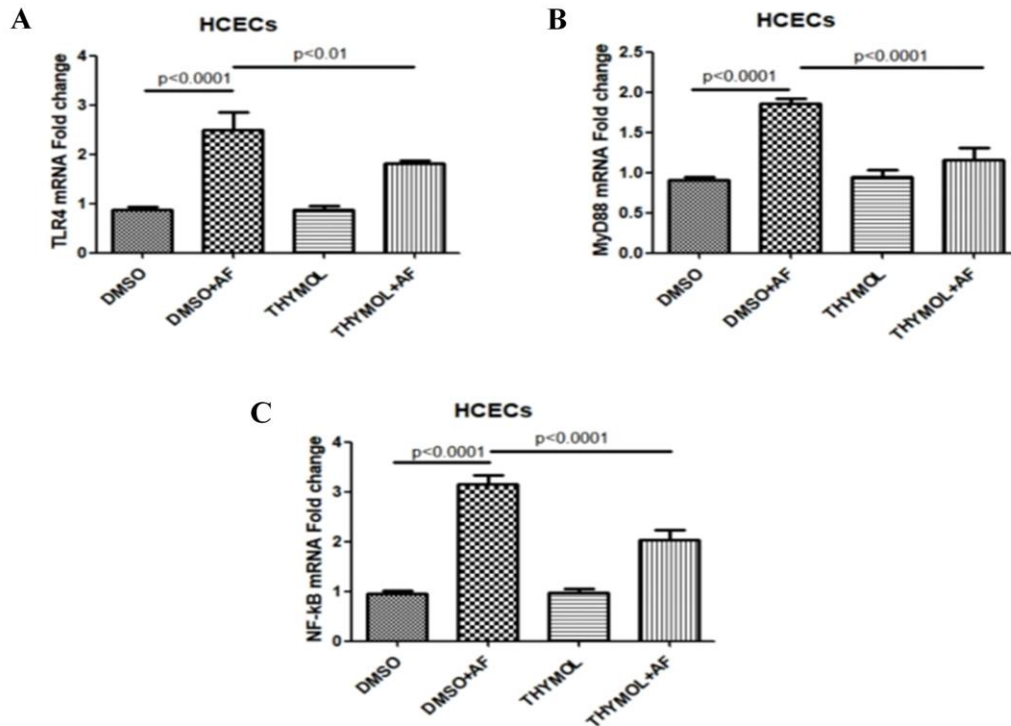

**Supplementary Fig. S1** After thymol pre-treatment, the mRNA (A, B, C) of TLR4, MyD88, NF-kB in HCECs stimulated with *A. fumigatus* conidia were significantly decreased.
